# Supplementary material for: Transparent and ultra-bendable all-solid-state supercapacitors without percolation problems
Source: Royal Society of Chemistry journal article supplement (doi:10.1039/c3sc22011g), 2013-01-01
Supplement: c3sc22011g.pdf [file c3sc22011g.pdf]

## **Electronic Supplementary Information:**

# **Transparent and ultra-bendable all-solid-state supercapacitors without percolation problems**

Inho Nam, Soomin Park, Gil-Pyo Kim, Junsu Park and Jongheop Yi\*

*World Class University program of Chemical Convergence for Energy & Environment,  
Institute of Chemical Processes, School of Chemical and Biological Engineering, College of  
Engineering, Seoul National University, Seoul 151-742, Republic of Korea*

\*To whom correspondence should be addressed: [jyi@snu.ac.kr](mailto:jyi@snu.ac.kr)

Fax: +82 8-888-0780; Tel: +82 2-880-7438

### **Contents**

- **Supplementary Methods**
- **Supplementary Fig. S1-S3**

## Supplementary Methods

### 1. Experiment

A positive photoresist layer was spin coated and developed on a PET substrate using a photomask (MA-6, Karl-suss). A Cr layer and Au layer were sequentially thermally evaporated onto the same layer to serve as an adhesion layer and a supercapacitor current collector was applied (ALPS-C03, alpha plus). Vertically oriented hierarchical MnO<sub>2</sub> structure was electrodeposited on the surface of the Au layer. For electrodeposition, the platform was immersed in aqueous solutions of Mn(NO<sub>3</sub>)<sub>2</sub> (0.02 M) and NaNO<sub>3</sub> (0.1 M) (WPG100, Wonatech). The platform was used as the working electrode, and a Pt electrode was used as the counter electrode, an Ag/AgCl electrode used as the reference electrode, and a constant current of 100  $\mu\text{A cm}^{-2}$  was applied by means of a 10 min deposition time. The remaining photoresist was lifted off the photoresist with acetone followed by an overnight drying at room temperature and pressure. A H<sub>3</sub>PO<sub>4</sub>/PVA gel electrolyte was prepared by mixing PVA powder with water (1 g of PVA / 10 ml of H<sub>2</sub>O), H<sub>3</sub>PO<sub>4</sub> (0.8 g) together. The mixture was then heated to around 358K under vigorous stirring until the solution became clear. After cooling down and vaporizing about 48 h under ambient conditions, the electrolyte solidified to form an adhesive gel. After attaching the interdigitated electrode platform and gel membrane electrolyte, a transparent and flexible supercapacitor with interdigitated electrodes was finally produced.

### 2. Characterization

Magnified optical image image and SEM images of micro electrodes in the device were obtained using an optical microscope (HAL 100, Carl Zeiss) and field-emission scanning electron microscope (AURIGA, Carl Zeiss). UV-visible (UV-Vis) spectroscopy (Agilent

8453, HP) is used to determine the transmittance of each elements of device. CV and EIS measurements were carried out using a computer-controlled potentiostat (Iviumstat, Ivium) and C/D measurements were carried out using galvanostat (ZIVE sp2, ZIVE LAB).

### 3. Calculation of specific capacitance

The specific capacitances of symmetrical supercapacitors are calculated as follows. The capacitance ( $C$ ) was calculated using the voltammetric discharge integrated from the cyclic voltammogram according to the following equation;<sup>S1</sup>

$$C = \frac{\int i dt}{\Delta E} = \frac{Q}{\Delta E} \quad (1)$$

where  $i$  is the current (A),  $t$  the time (s) and  $\Delta E$  is the potential window (V).

The specific capacitance ( $C_{sp}$ ) is;<sup>S2</sup>

$$C_{sp} = \frac{4C}{M} \quad (2)$$

where  $M$  is the total weight of both the positive and negative electrodes.

### 4. References

- S1. Q. Lu, M. W. Lattanzi, Y. Chen, X. Kou, W. Li, X. Fan, K. M. Unruh, J. G. Chen and J. Q. Xiao, *Angew. Chem. Int. Ed.*, 2011, **50**, 6847.
- S2. L. Demarconnay, E. Raymundo-Piñero and F. Béguin, *Electrochem. Commun.*, 2010, **12**, 1275; V. Khomenko, E. Raymundo-Piñero and F. Béguin, *J. Power Sources*, 2006, **153**, 183; J. H. Park and O. O. Park, *J. Power Sources*, 2002, **111**, 185.

## Supplementary Figures

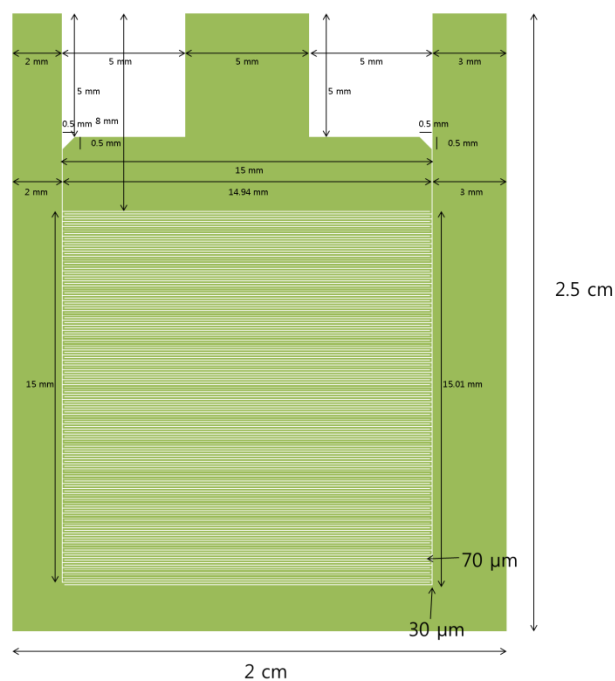

**Fig. S1.** Pattern design and linear dimensions of an interdigitated electrode system on a transparent and flexible supercapacitor without percolation. With 150 interdigitated electrodes, each microelectrode was 30 μm in width and 1.5 cm in length. The electrodes were interspaced by a distance of 70 μm. The occupied area of the transparent electrode was 1.5 cm × 1.5 cm. This area can be increased up to an area limit of the electrodeposition method (size of the counter electrode).

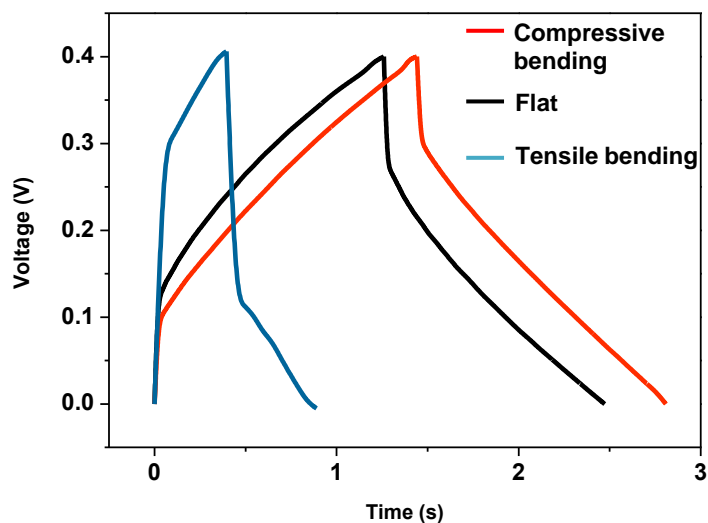

**Fig. S2.** Typical shapes of charge/discharge curve were observed for the different bending states of transparent and ultra-bendable supercapacitor with interdigitated patterned electrode system; flat, compressive and tensile bending state. Current density is  $150\mu\text{A cm}^{-2}$  and bending radius is 1.5 mm (curvature is  $6.7\text{ cm}^{-1}$ ).

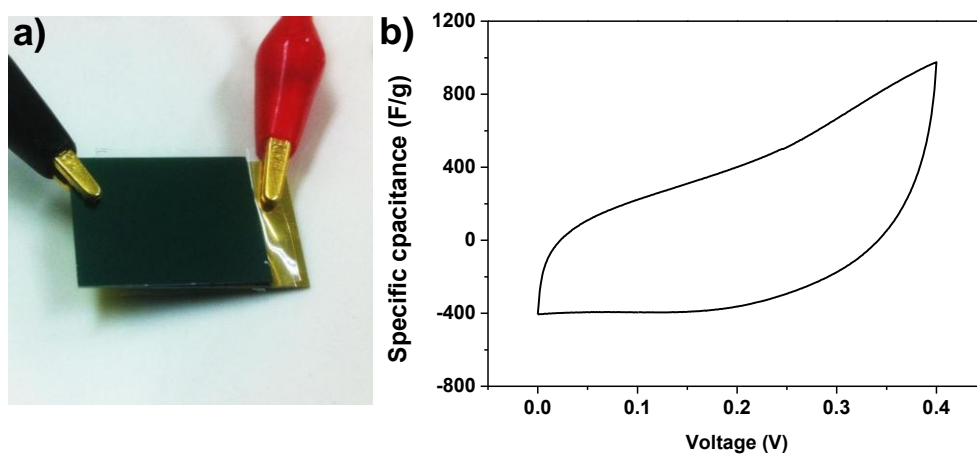

**Fig. S3.** a) Photograph and b) Cyclic voltammogram for a conventional sandwich type supercapacitor based on the same hierarchical  $\text{MnO}_2$  structure.
